# Supplementary material for: Risk Awareness about Tetracycline-Induced Tooth Discolouration among Pregnant Women attending the University of Port-Harcourt Teaching Hospital Antenatal Clinic in Nigeria
Source: Research Square preprint supplement (doi:10.21203/rs.3.rs-7023176/v1), 2025-07-09
Supplement: Supplementary file 1 [file 64cdabcb3611f709dffb4c3f.docx]

**PERCEPTION AND RISK AWARENESS OF PREGNANT WOMEN ABOUT TETRACYCLINE INDUCED TOOTH DISCLOURATION**

**Dear Respondent**

**This anonymous questionnaire is designed to obtain information that would enable me to carry out research on the above-mentioned title.**

**I humbly request that you make out time to answer the questions accordingly, sincerely and confidentially. No information about you will be disclosed in any way and the data I for research purpose only. I thank you for your anticipated co-operation.**

**SECTION A; SOCIO-DEMOGRAPHIC INFORMATION**

Please tick and provide answers as you feel most appropriate.

1. Age as at Last Birthday _________________________________

2. Occupation; Professional Skilled Worker Semi skilled Worker

Unskilled Worker Dependent

3. Level of Education; No formal education Primary education

Secondary education Tertiary education

4. Marital Status; Single Married Divorced

5. Gestational age; First trimester Second trimester Third trimester

7. Number of previous pregnancies; One Two or more

**SECTION B; SELF MEDICATION HABITS OF TETRCYCLINE AMONG PREGNANT WOMEN**

Please tick the box the expresses your best response to the questions

| **YES** | **NO** |
| --- | --- |
| **1. Do you take drugs without the doctor telling you to?** |  |  |
| **2.If yes to the question above, reasons for taking drugs without the doctor telling you to?** | | |
| It was previously given to me by a doctor |  |  |
| It was previously given to me by a pharmacist |  |  |
| I always have the drugs at home |  |  |
| It was previously suggested by family members |  |  |
| It was previously suggested by friends |  |  |
| **3. Have you taken Tetracycline during pregnancy without the doctor telling you to?** |  |  |
| **4. If yes to the questions above, at what time of pregnancy?** | | |
| First Trimester | |  |
| Second Trimester | |  |
| Third Trimester | |  |
| **5. If yes to the question above, reasons for taking tetracycline without the doctor telling you to?** | | |
| It was previously given to me by a doctor |  |  |
| It was previously given to me by a pharmacist |  |  |
| I always have the drugs at home |  |  |
| It was previously suggested by family members |  |  |
| It was previously suggested by friends |  |  |
| **6. Where do you get the tetracycline drug from?** | | |
| Hospital Pharmacy shops |  |  |
| Roadside Pharmacy shops |  |  |
| Local chemist shops |  |  |
| **7. How did you know the dosage of tetracycline to use?** | | |
| I checked the package |  |  |
| I asked a doctor |  |  |
| I asked a pharmacist |  |  |
| I asked my family or friends |  |  |
| From my last use |  |  |

**SECTION C; RISK AWARENESS OF PREGNANT WOMEN ABOUT TETRACYCLINE USE IN PREGNANCY**

Generally speaking, what are your responses to the following?

| **Totally Unaware** | **Unaware** | **Aware** | **Very Aware** |
| --- | --- | --- | --- |
| 1. Tetracycline are safe for use in pregnancy |  |  |  |  |

**SECTION D; KOWLEDGE OF PREGNANT WOMEN ABOUT TETRACYCLINE INDUCED TOOTH DISCOLOURATION**

Generally speaking, what are your responses to the following?

| **False** | **I don’t Know** | **True** |
| --- | --- | --- |
| 1. The milk teeth of the baby can be permanently discoloured if tetracycline is used in pregnancy |  |  |  |
| 2. The extent of discolouratin depends on the dosage of tetracycline |  |  |  |
| 3. The discoloured tooth fluoresce under light exposure |  |  |  |
| 4. The colour of the discoloured teeth changes overtime |  |  |  |
| 5. Tetracycline use during childhood can cause discolouration of the permanent teeth |  |  |  |
